# Supplementary material for: Multi-omics profiling reveals a distinctive epigenome signature for high-risk acute promyelocytic leukemia
Source: PubMed Central journal article supplement (PMC5986653; doi:10.18632/oncotarget.25429), 2018-05-22
Supplement: oncotarget-09-25647-s001.pdf [file oncotarget-09-25647-s001.pdf]

## Multi-omics profiling reveals a distinctive epigenome signature for high-risk acute promyelocytic leukemia

### SUPPLEMENTARY MATERIALS

Supplementary Table 1: Hyperacetylated regions (hg19) in hrAPLs

| chromosome | start     | end       |
|------------|-----------|-----------|
| chr1       | 95181929  | 95184074  |
| chr1       | 109626120 | 109627905 |
| chr1       | 249221773 | 249222010 |
| chr11      | 57158202  | 57159391  |
| chr14      | 61416231  | 61417467  |
| chr14      | 105391316 | 105391725 |
| chr17      | 70982083  | 70984392  |
| chr17      | 71061705  | 71070236  |
| chr2       | 27060445  | 27061863  |
| chr2       | 102056668 | 102060845 |
| chr2       | 234072888 | 234075888 |
| chr20      | 2665743   | 2666563   |
| chr22      | 50153595  | 50155770  |
| chr3       | 41011746  | 41014498  |
| chr6       | 10087785  | 10088550  |
| chr6       | 82468660  | 82469114  |
| chr6       | 139948334 | 139949640 |
| chr6       | 140000376 | 140002294 |
| chr7       | 29323864  | 29325989  |
| chr9       | 94907894  | 94910771  |
| chrX       | 37605417  | 37607058  |
| chrX       | 151152531 | 151154618 |

**Supplementary Table 2: Hypomethylated CpGs (hg19) in hrAPLs**

| <b>chromosome</b> | <b>start</b> | <b>end</b> |
|-------------------|--------------|------------|
| chr1              | 1052949      | 1052950    |
| chr1              | 12655992     | 12655993   |
| chr1              | 17287501     | 17287502   |
| chr1              | 55266578     | 55266579   |
| chr2              | 237477262    | 237477263  |
| chr3              | 35706114     | 35706115   |
| chr3              | 57198244     | 57198245   |
| chr4              | 3516534      | 3516535    |
| chr4              | 163085348    | 163085349  |
| chr6              | 73972852     | 73972853   |
| chr12             | 57630107     | 57630108   |
| chr12             | 114841708    | 114841709  |
| chr14             | 24779959     | 24779960   |
| chr16             | 1429015      | 1429016    |
| chr16             | 20817501     | 20817502   |
| chr16             | 46919112     | 46919113   |
| chr16             | 67197640     | 67197641   |
| chr17             | 39845949     | 39845950   |
| chr19             | 3275394      | 3275395    |
| chr19             | 35531990     | 35531991   |
| chr19             | 39056084     | 39056085   |
| chr20             | 21687378     | 21687379   |
| chr20             | 62084626     | 62084627   |

**Supplementary Table 3: BLUEPRINT samples used in Singh *et al.* See Supplementary\_Table\_3**
